# Supplementary material for: Sulfite oxidase deficiency causes persulfidation loss and hydrogen sulfide release
Source: JCI journal article supplement (doi:10.1172/jci181299), 2025-11-02

Figure 1C –SO

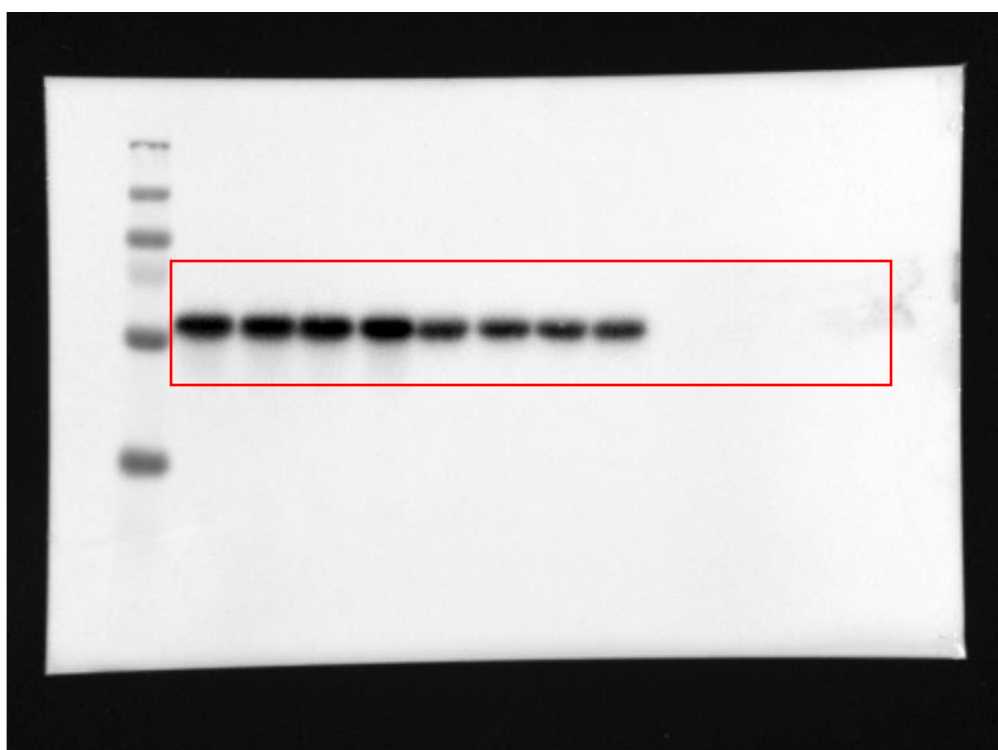

Figure 1C –SO pc

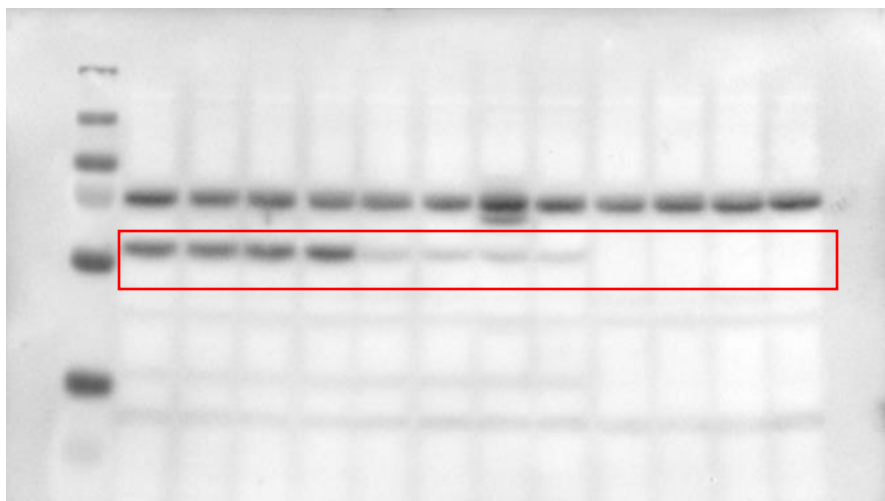

Figure 1C –GAPDH

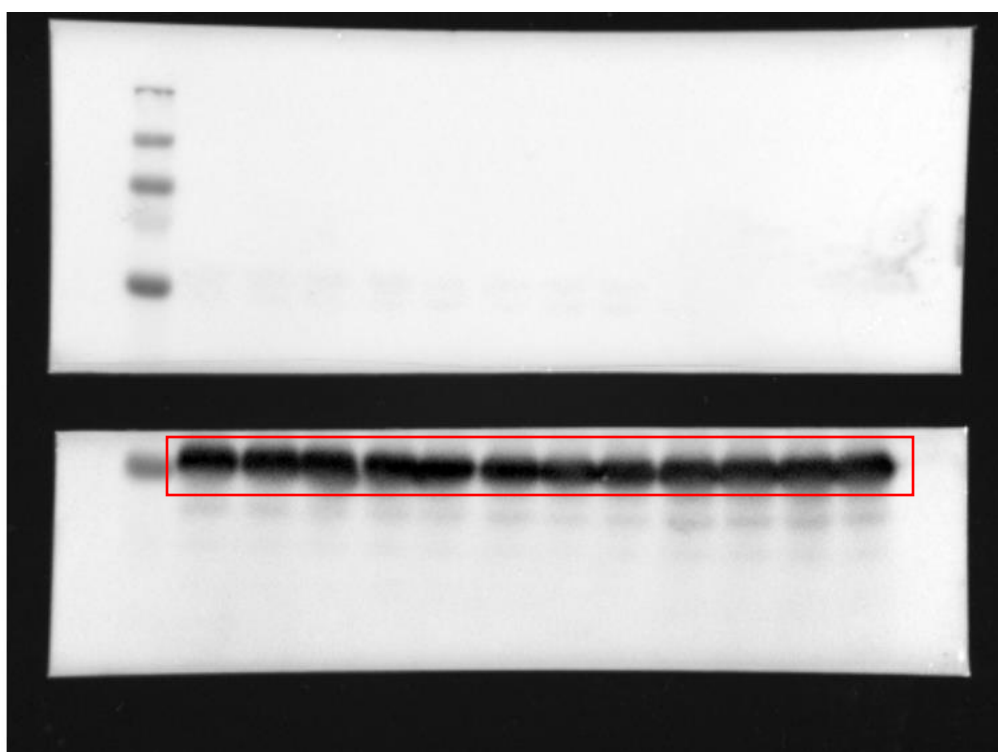

Figure 4B

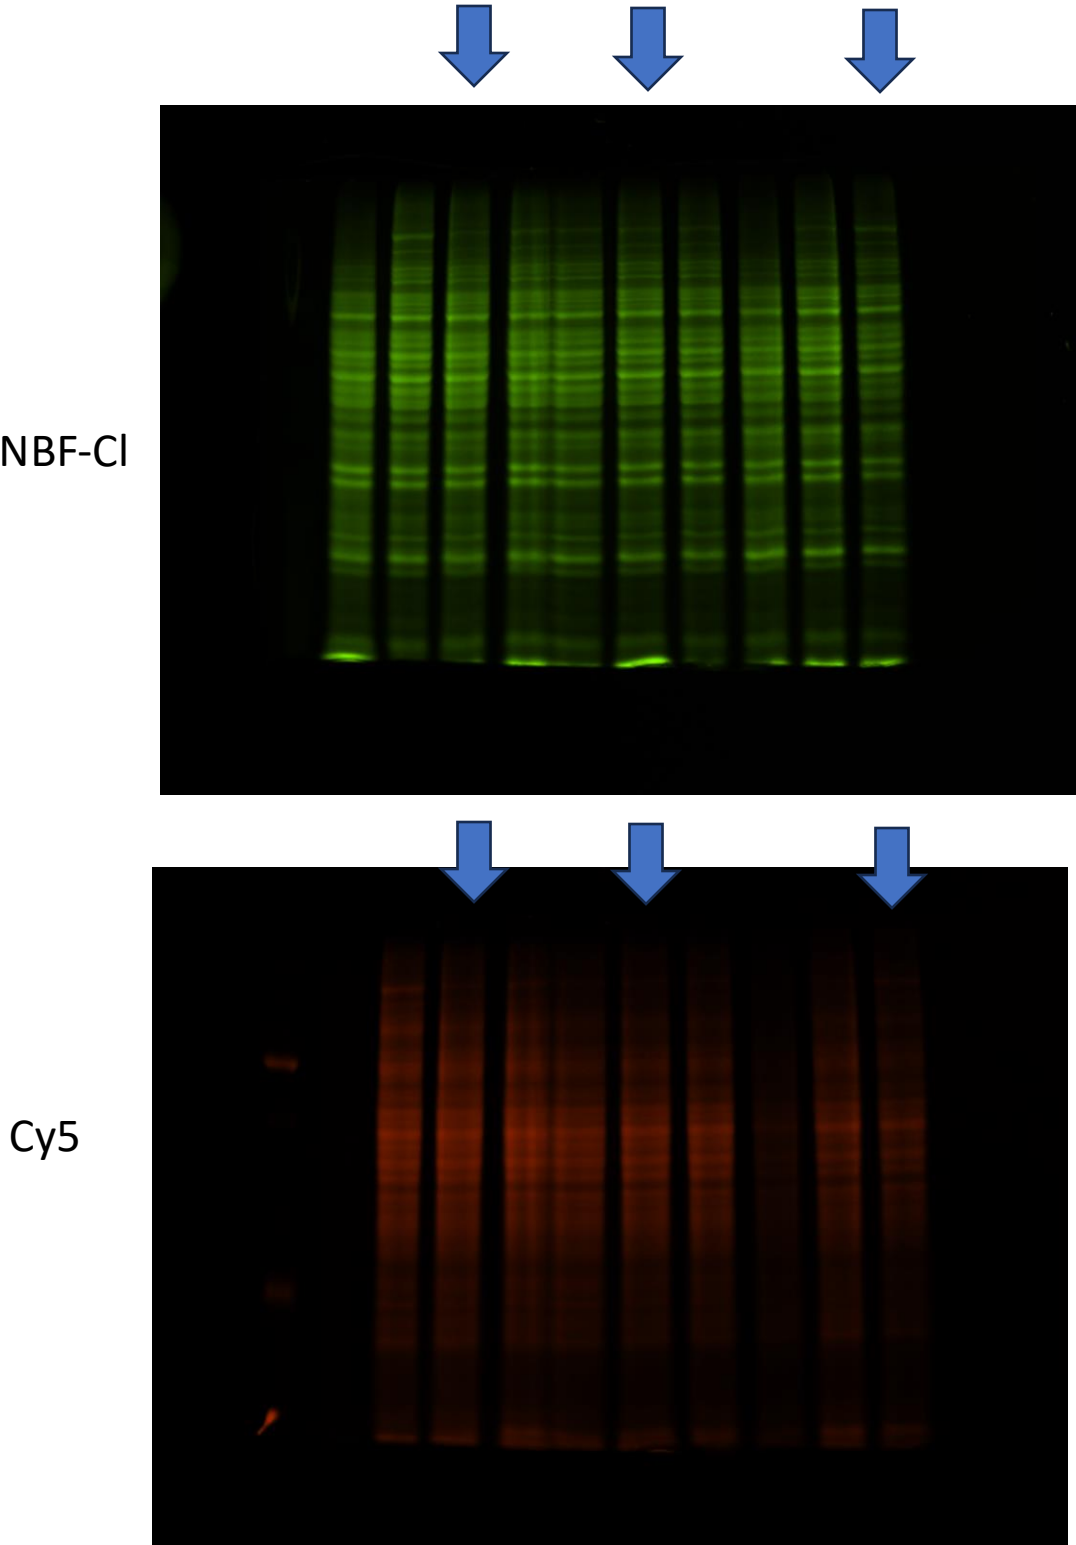

# Suppl. Figure 5B – Kidney SQR

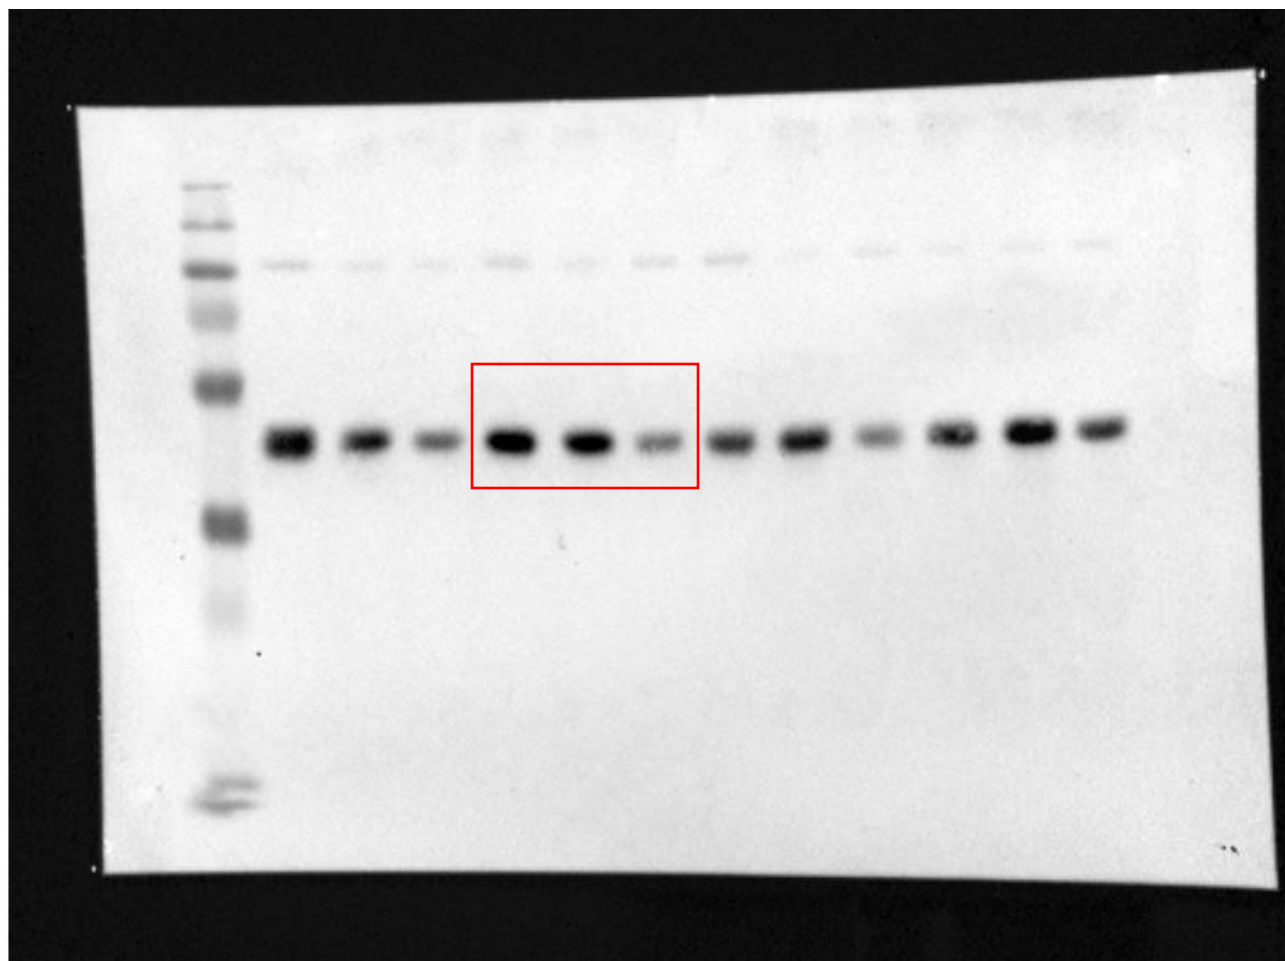

# Suppl. Figure 5B – Kidney TST

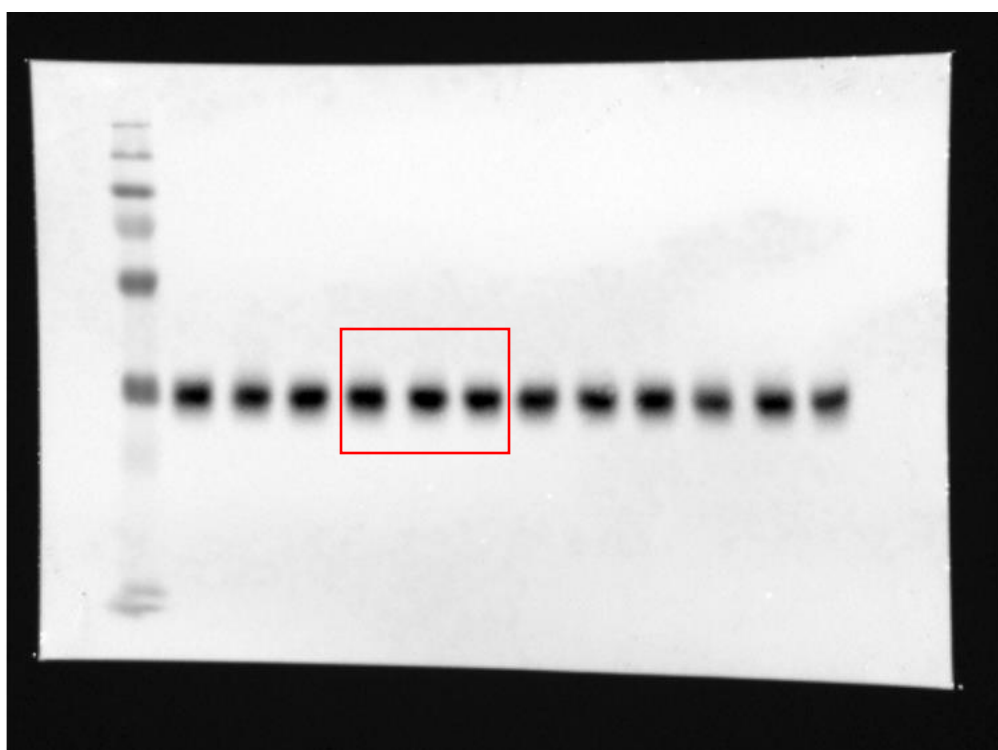

# Suppl. Figure 5B – Kidney SO

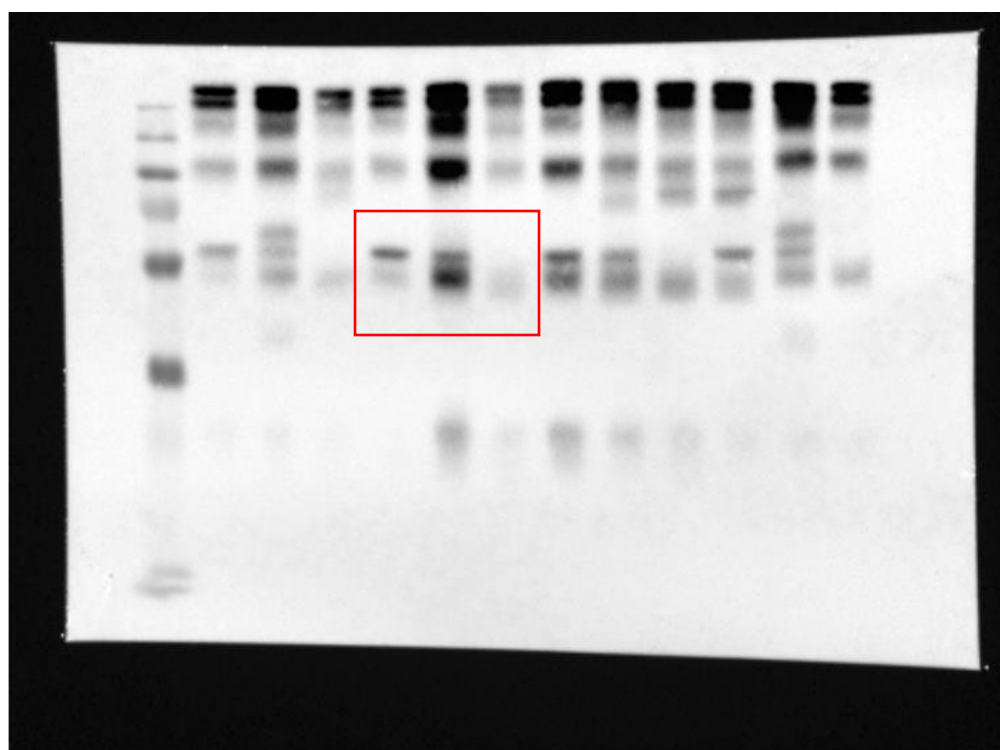

# Suppl. Figure 5B - kidney VCL

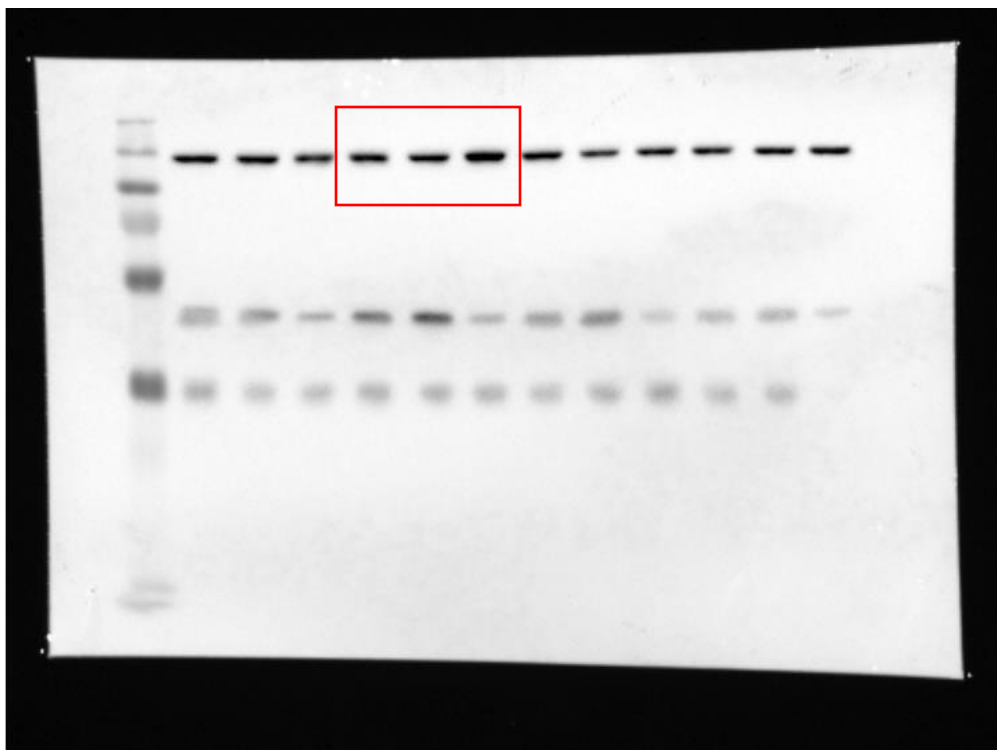

Suppl. Figure 5B – liver SQR

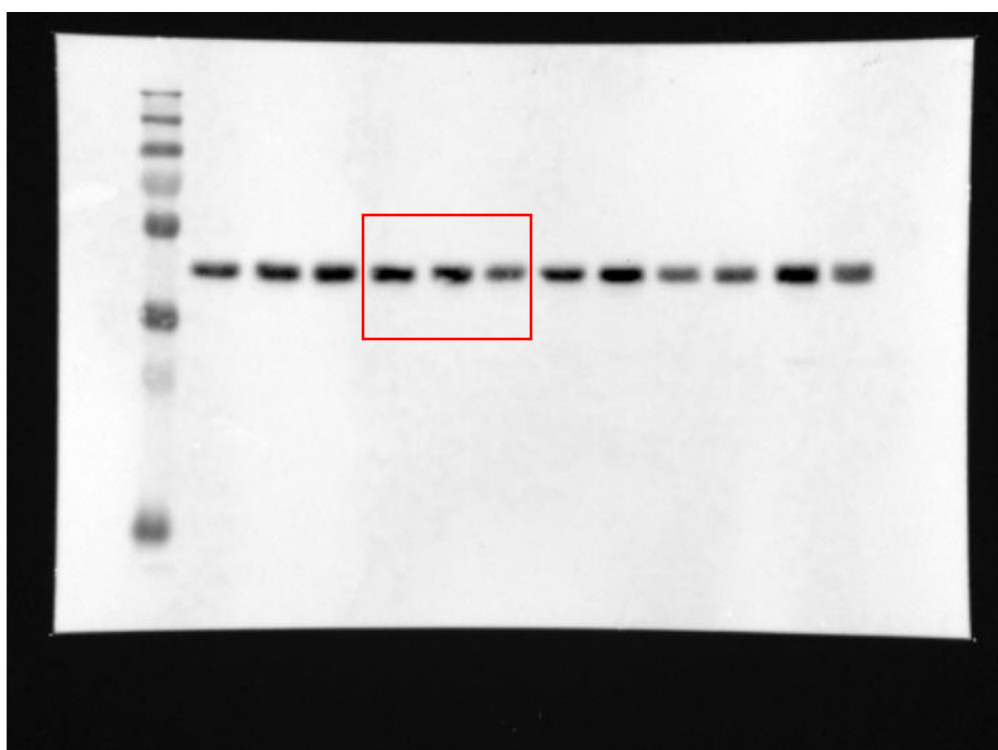

# Suppl. Figure 5B – liver TST

admin 2019-03-04 16hr 04min+admin 2019-03-04 16hr 03min\_Exposure\_3.0sec

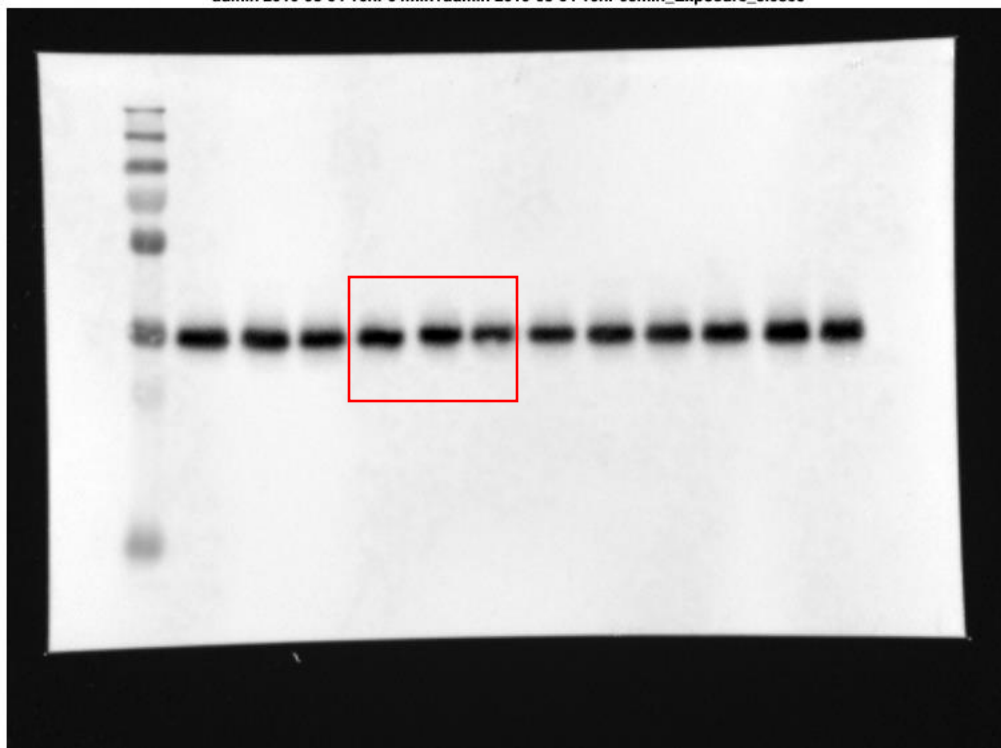

# Suppl. Figure 5B – liver SO

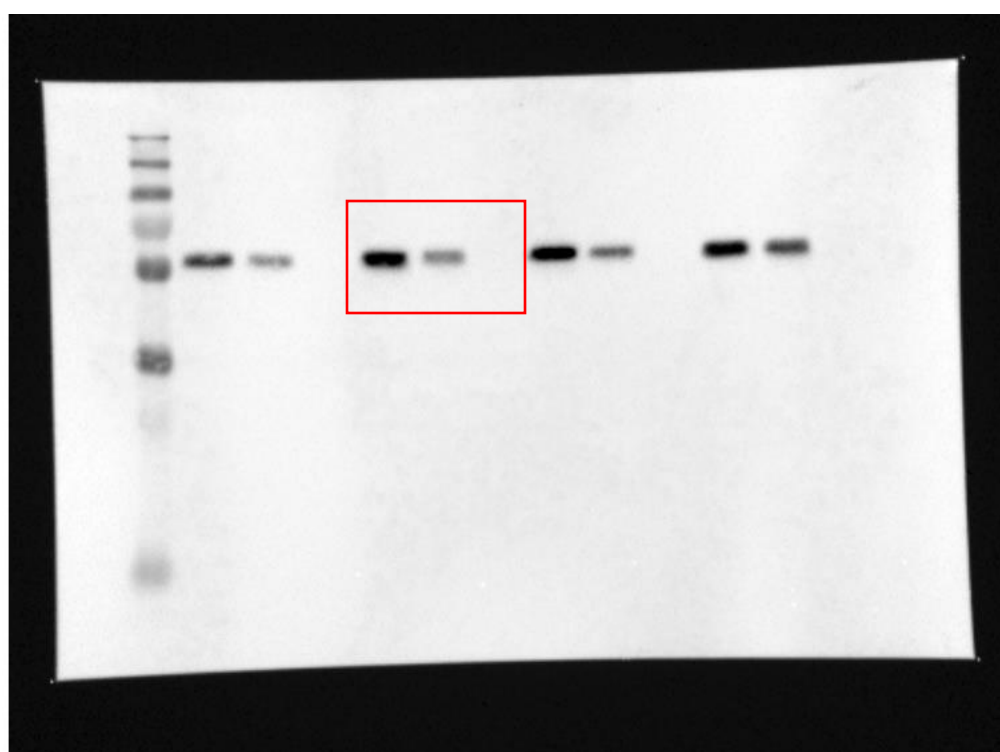

# Suppl. Figure 5B - VCL

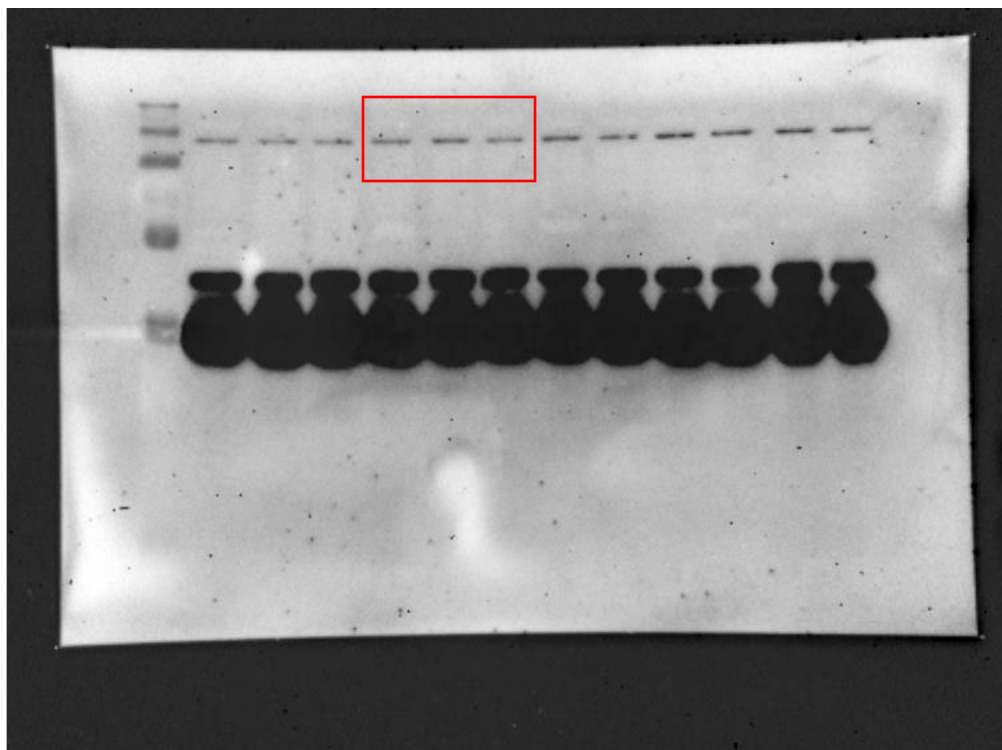

# Suppl. Figure 5C SQR

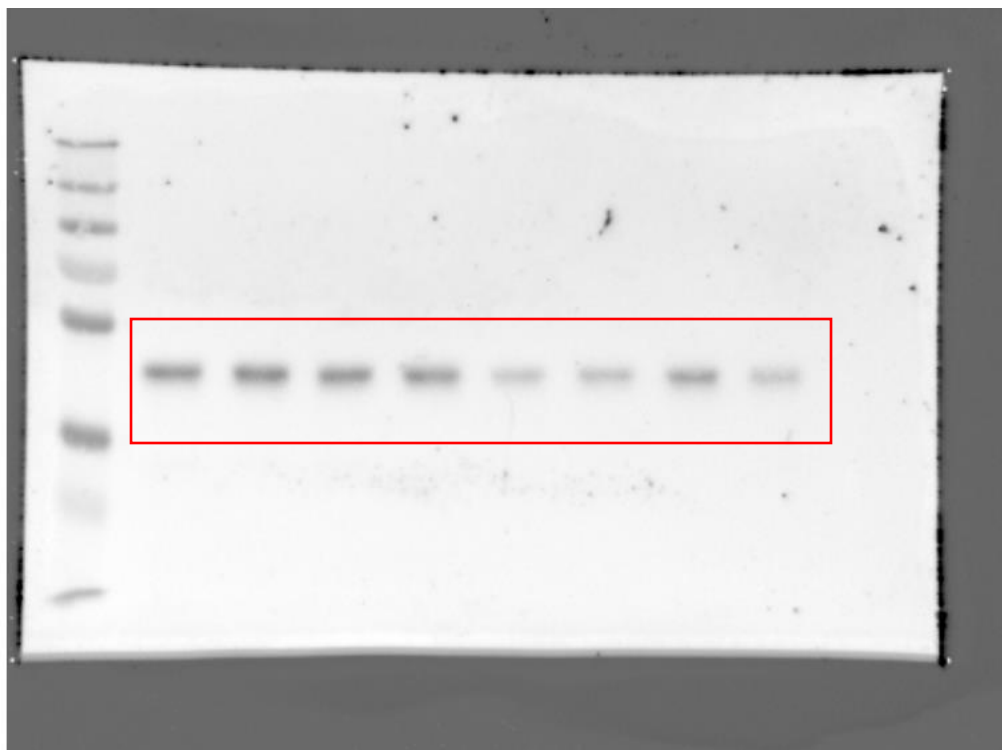

# Suppl. Figure 5C TST

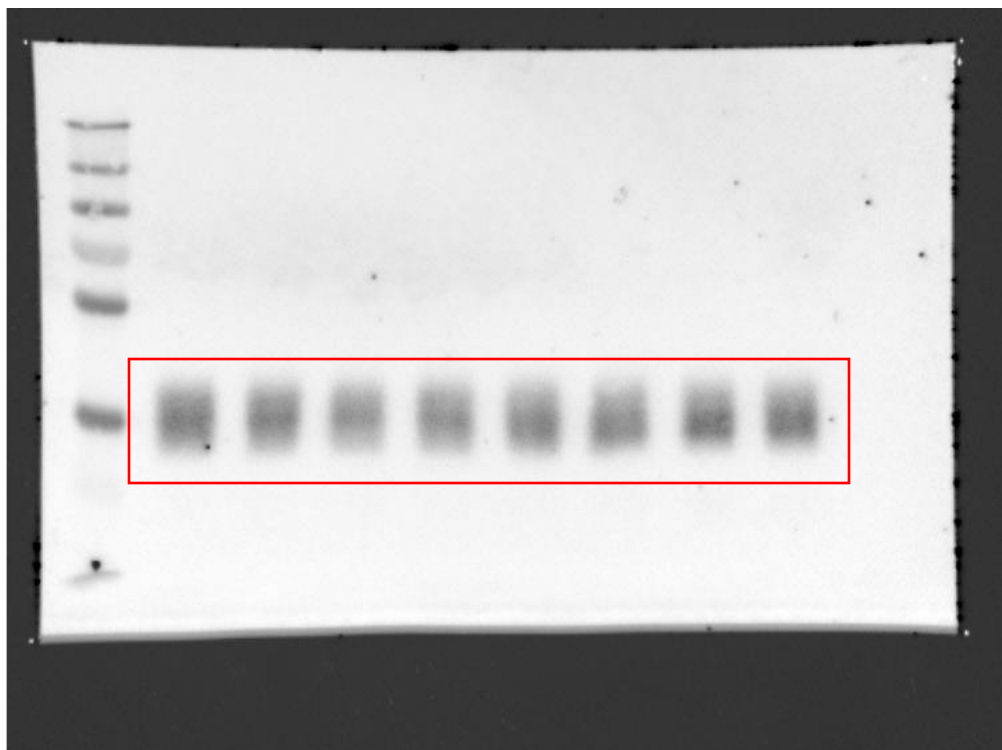

# Suppl. Figure 5C S0

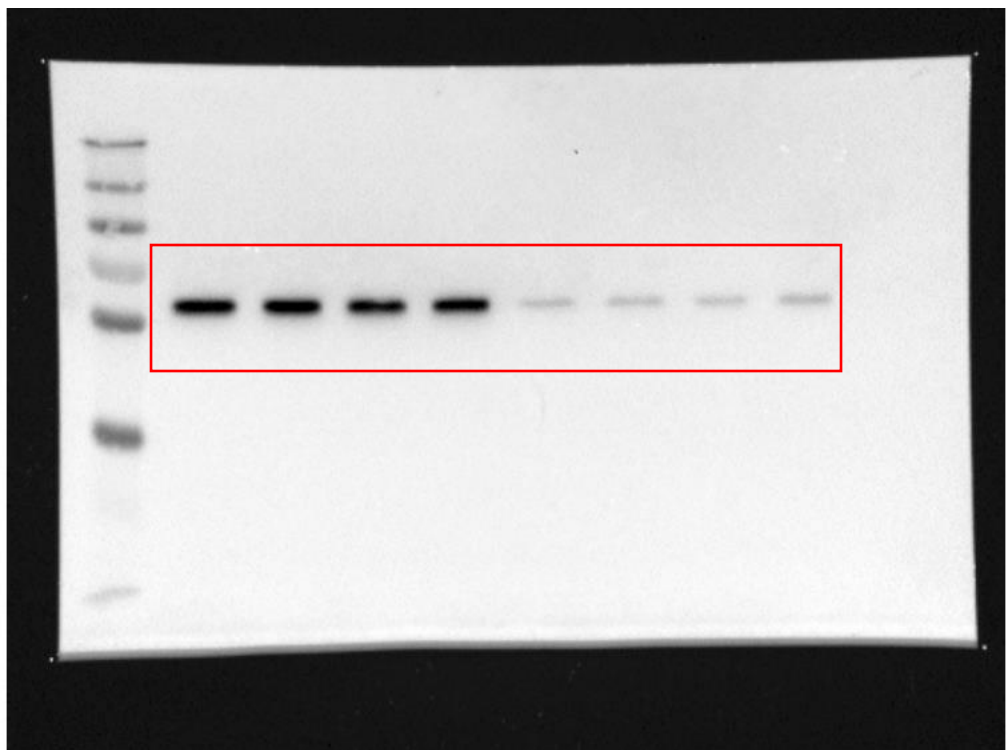

# Suppl. Figure 5C GAPDH

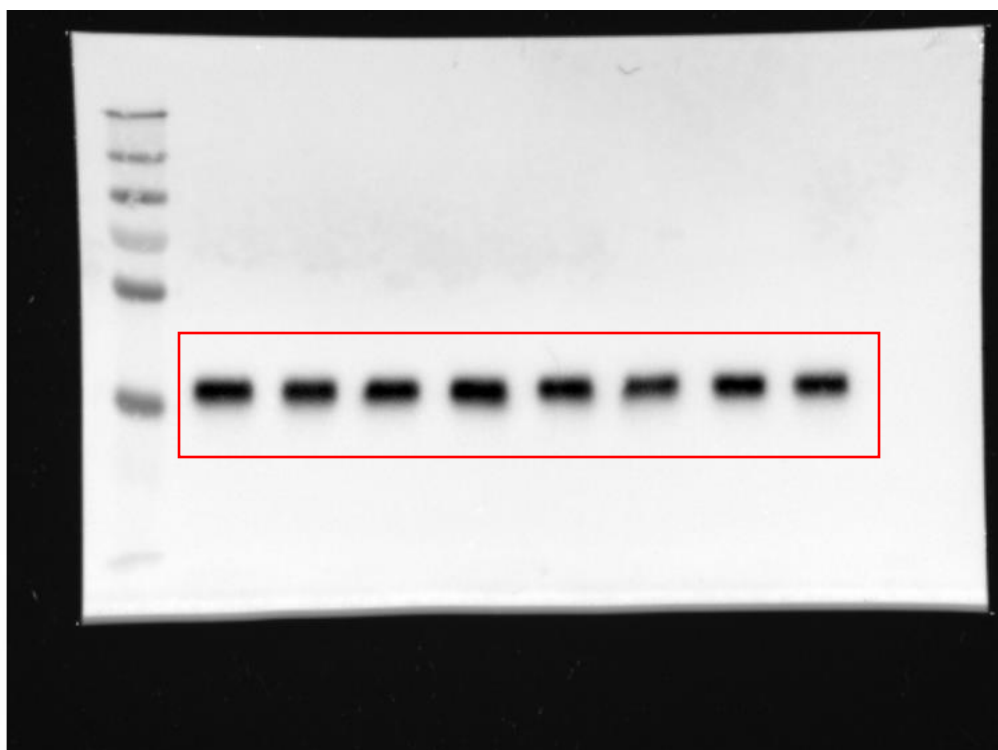

# Suppl. Figure 5D SQR

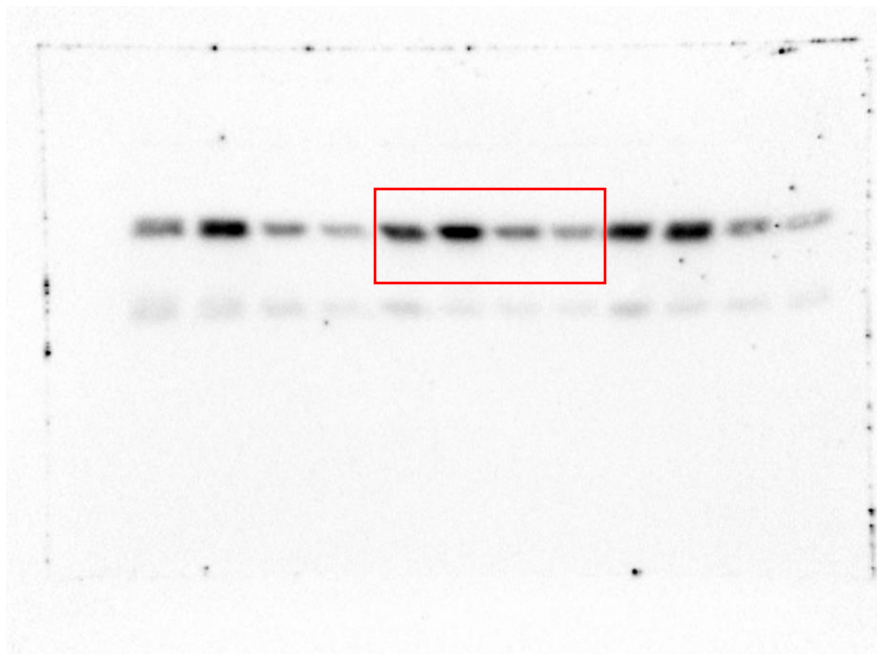

# Suppl. Figure 5D TST

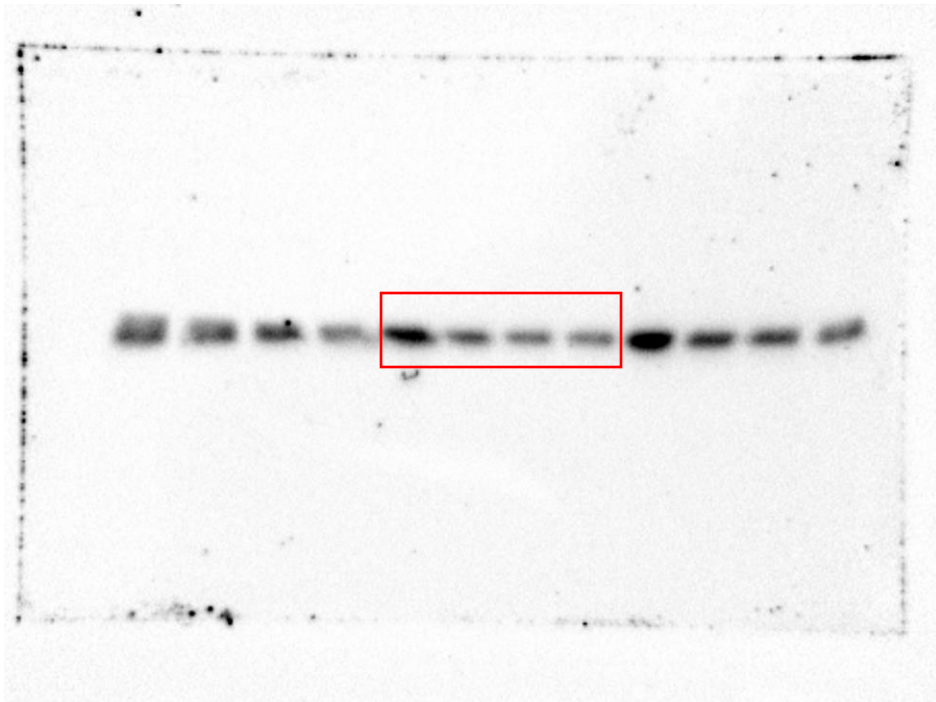

# Suppl. Figure 5D S0

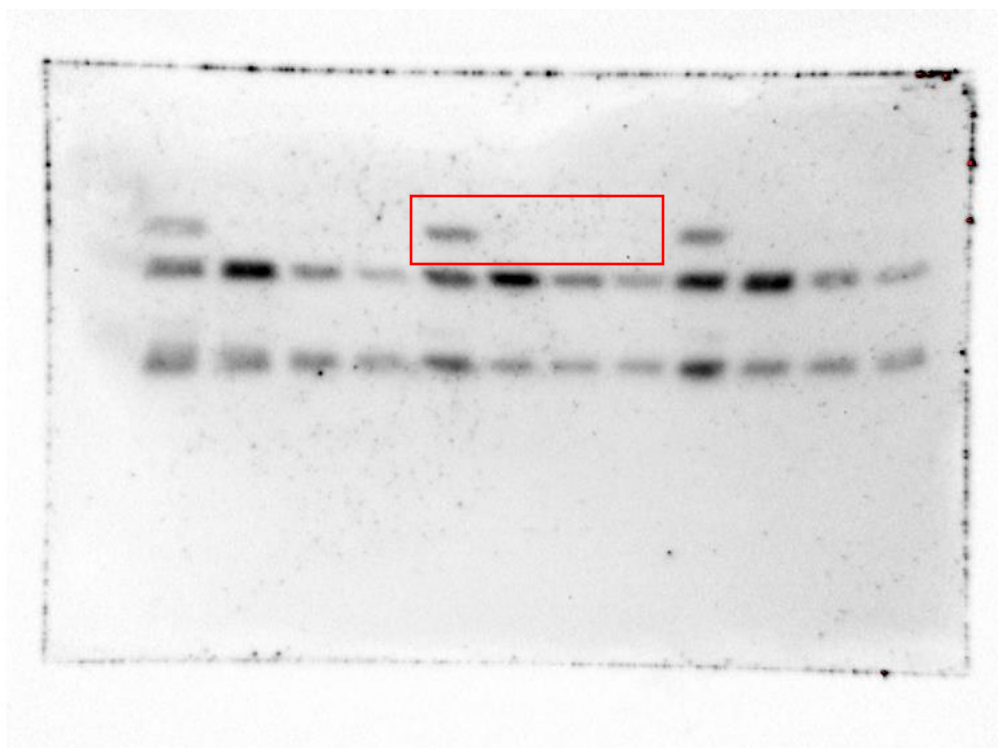

# Suppl. Figure 5D VCL

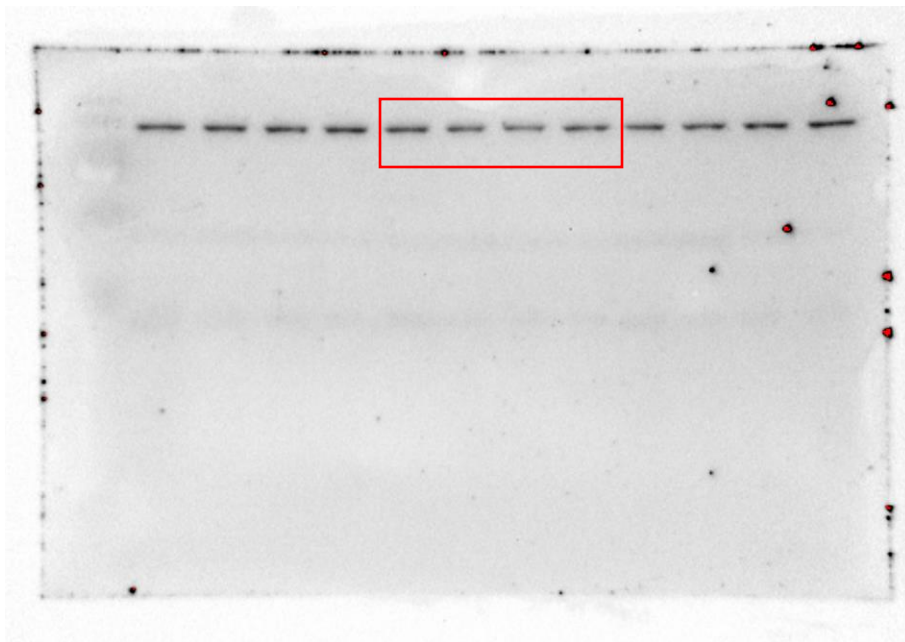

Supplement: sd2 [file 2]
